# Supplementary material for: Simple and facile preparation of silver–polydopamine (Ag–PDA) core–shell nanoparticles for selective electrochemical detection of cysteine
Source: Royal Society of Chemistry journal article supplement (doi:10.1039/c6ra06994k), 2016-01-01
Supplement: c6ra06994k1.pdf [file c6ra06994k1.pdf]

**Electronic Supplementary Information (ESI) File:**

**Simple and Facile Preparation of Silver – Polydopamine (Ag – PDA) Core – Shell Nanoparticles for Selective Electrochemical Detection of Cysteine**

**Raju Thota<sup>a,b</sup> and V. Ganesh<sup>a,b,\*</sup>**

<sup>a</sup> *Electrodics and Electrocatalysis (EEC) Division, CSIR – Central Electrochemical Research Institute (CSIR – CECRI), Karaikudi – 630003, Tamilnadu, India.*

*Tel: +91-4565-241242; Fax: +91-4565-227779.*

<sup>b</sup> *Academy of Scientific and Innovative Research (AcSIR), New Delhi – 110025, India.*

\*Corresponding Author's E-mail: [vganesh@cecri.res.in](mailto:vganesh@cecri.res.in) (or) [ganelectro@gmail.com](mailto:ganelectro@gmail.com)

**Figures:**

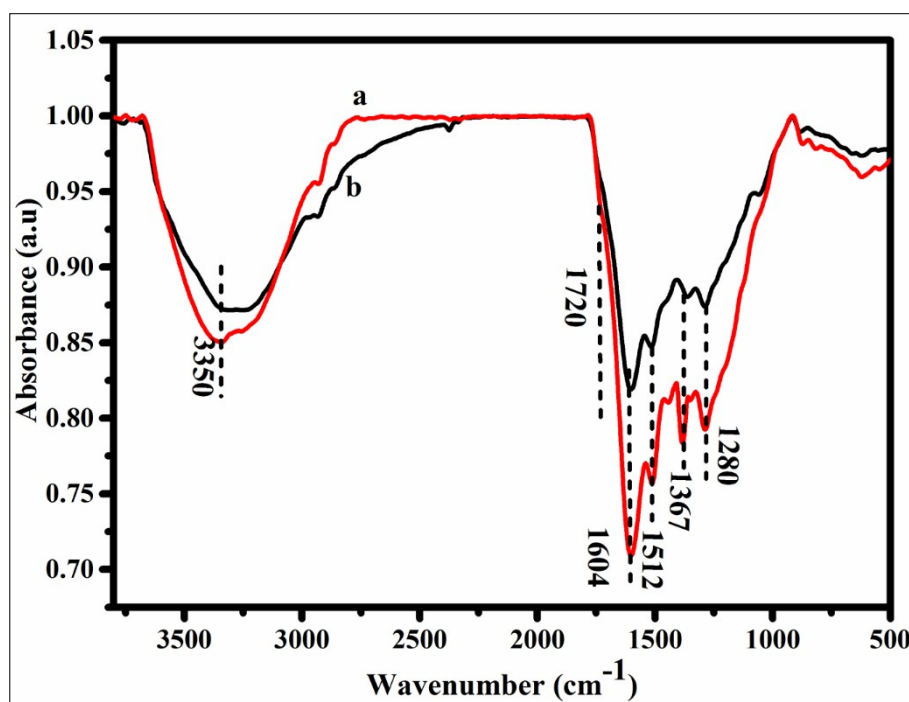

**Figure S1:** FTIR spectra of a) PDA and b) Ag–PDA nanoparticles.

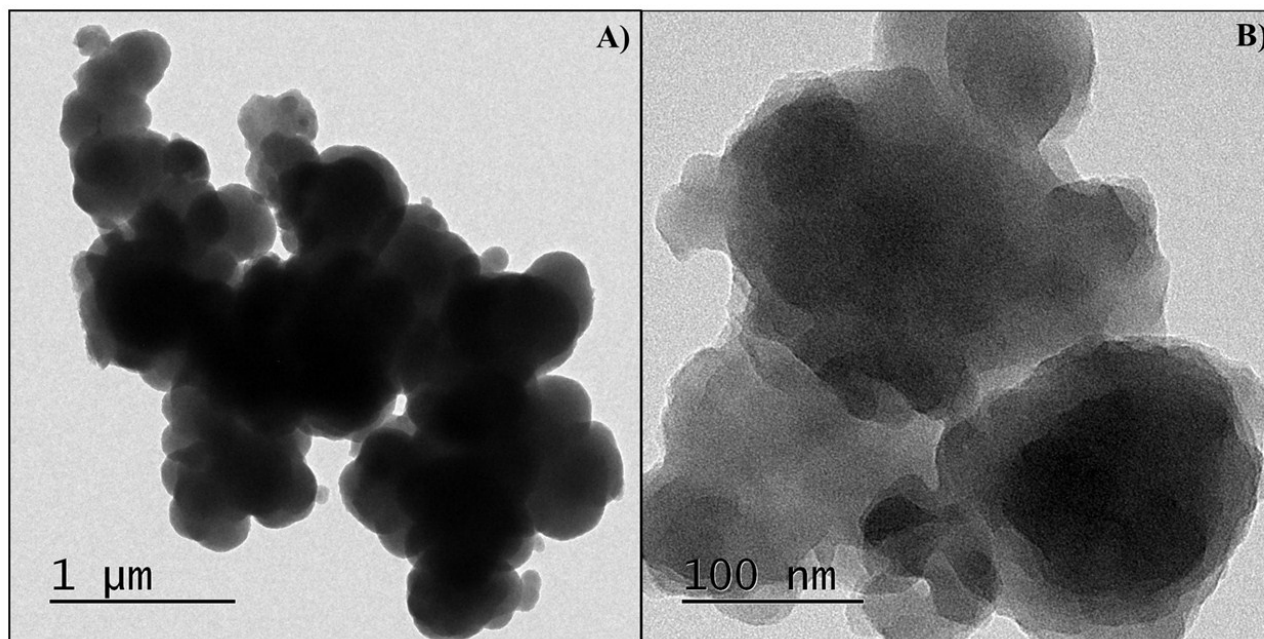

**Figure S2:** TEM images of PDA in absence of Ag at different scales.

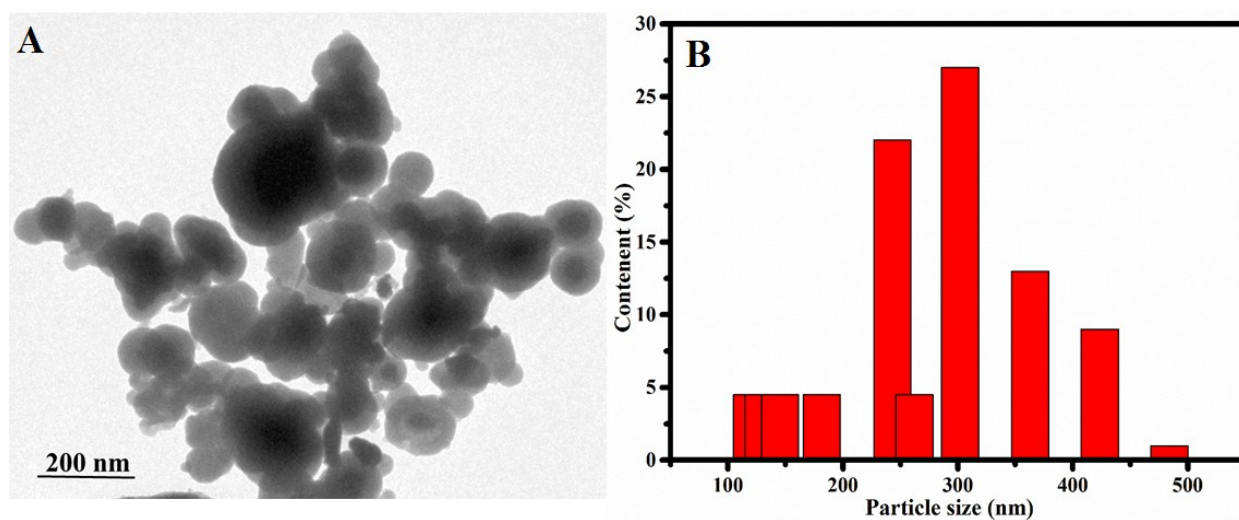

**Figure S3:** TEM image of Ag-PDA nanoparticles (A) and its corresponding particle size distribution graph (B).

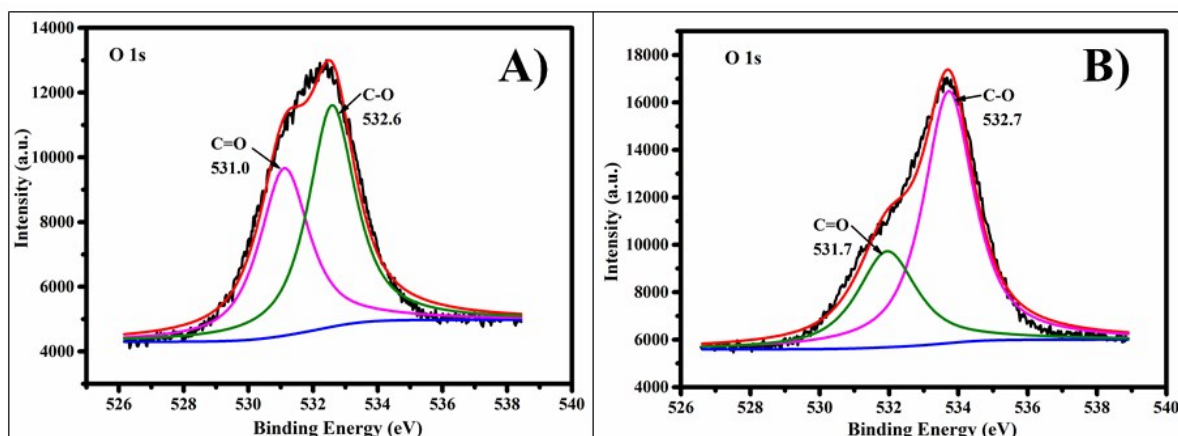

**Figure S4:** X-ray photoelectron spectra (XPS) corresponding to O 1s region of (A) PDA and (B) Ag-PDA nanoparticles respectively.

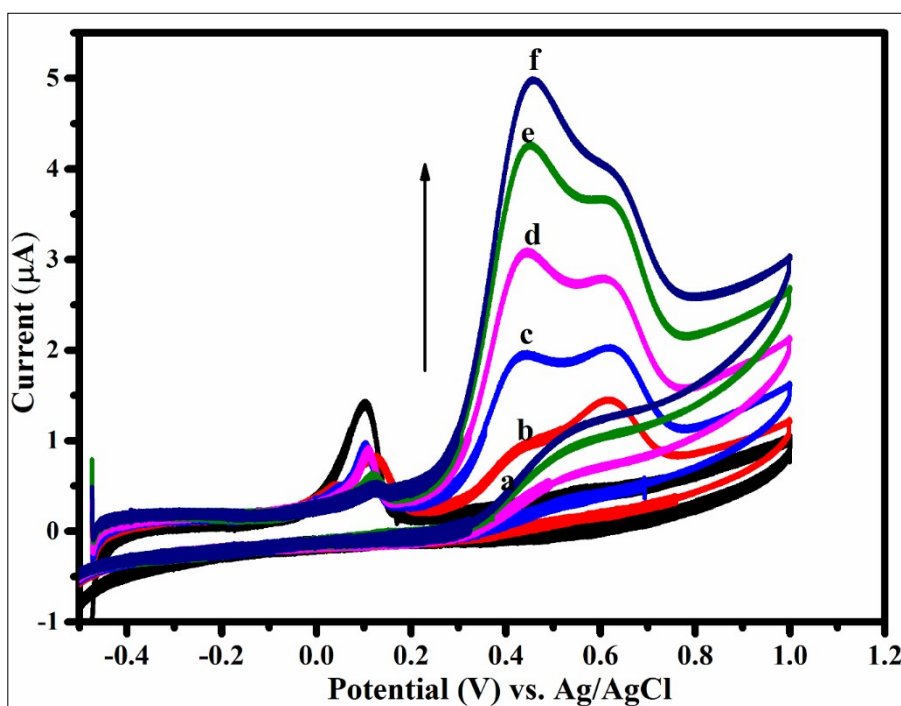

**Figure S5:** Cyclic voltammograms of Ag-PDA/ITO electrode in 0.1 M PBS (pH = 5.0) buffer solution at a scan rate of  $50 \text{ mV s}^{-1}$  for (b)  $25 \mu\text{M}$ , (c)  $50 \mu\text{M}$ , (d)  $75 \mu\text{M}$ , (e)  $100 \mu\text{M}$  and (f)  $125 \mu\text{M}$  of CySH concentrations respectively. Here (a) denotes the control experiment where no CySH is added.

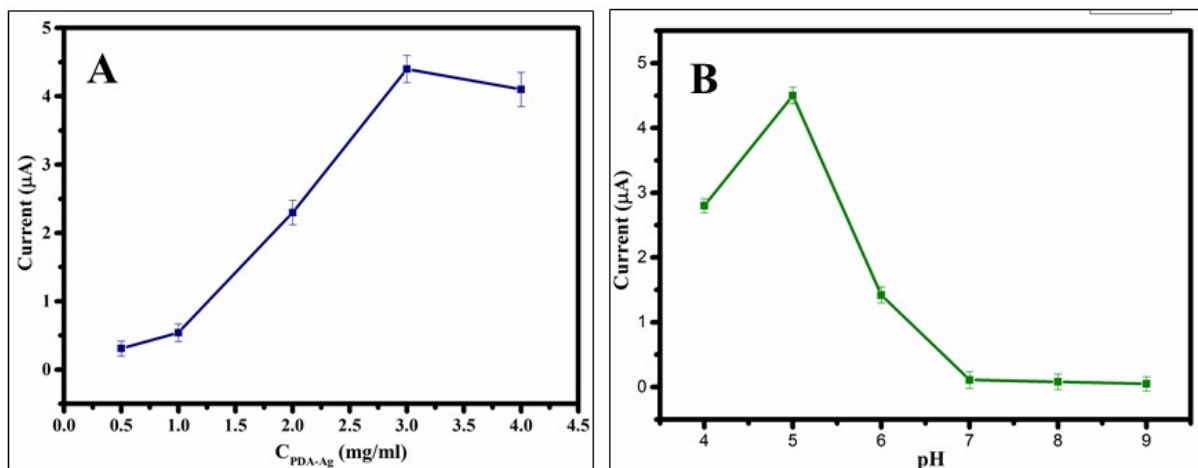

**Figure S6:** Plots of (A) various concentrations of Ag–PDA nanoparticles namely 0.5 mg/ml, 1 mg/ml, 2 mg/ml, 3 mg/ml and 4 mg/ml vs. oxidation current measured and (B) variation of pH (from 4 to 9) vs. current values corresponding to oxidation of CySH. The oxidation current values are measured from CV responses for 25  $\mu\text{M}$  CySH at a fixed sweep rate of 50  $\text{mV s}^{-1}$ .

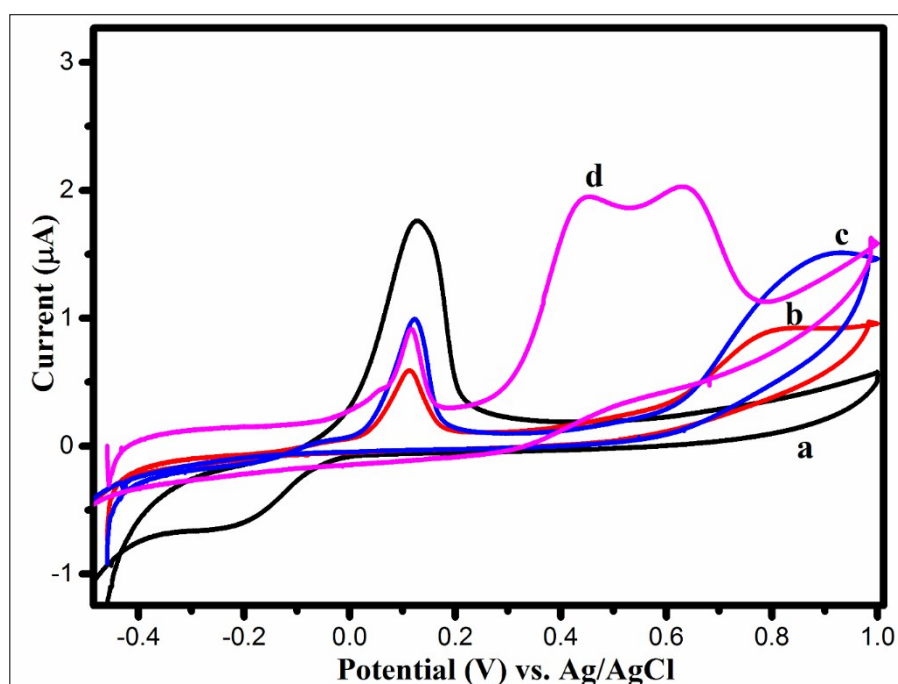

**Figure S7:** Cyclic voltammograms of Ag–PDA/ITO electrode without any addition of analyte (a) and for the addition of (b) 0.5 mM HCy, (c) 0.5 mM GSH and (d) 50  $\mu\text{M}$  CySH respectively in 0.1 M PBS (pH = 5.0) buffer solution at a fixed scan rate of 50  $\text{mV s}^{-1}$ .
